# Supplementary material for: Knowledge on Stroke Recognition and Management among Emergency Department Healthcare Professionals in the Republic of Cyprus
Source: Healthcare (Basel). 2023 Dec 29;12(1):77. doi: 10.3390/healthcare12010077 (PMC10778653; doi:10.3390/healthcare12010077)
Supplement: Supplementary file 1 [file healthcare-12-00077-s001.zip › healthcare-2740178-supplementary.pdf]

**Supplementary File S1 (SF1):** Questionnaire for assessing knowledge on stroke recognition and management among Emergency Department Healthcare Professionals in the Republic of Cyprus

**Part A**

|                                                                                                                                                          |                             |                            |                                   |                                 |                                 |                   |
|----------------------------------------------------------------------------------------------------------------------------------------------------------|-----------------------------|----------------------------|-----------------------------------|---------------------------------|---------------------------------|-------------------|
| <b>Sociodemographic and employment characteristics</b>                                                                                                   |                             |                            |                                   |                                 |                                 |                   |
| 1. Age                                                                                                                                                   | 20-29                       | 30-39                      |                                   | 40-49                           | 50-60                           | >60               |
| 2. Gender                                                                                                                                                | Male                        |                            |                                   | Female                          |                                 |                   |
| 3. Profession                                                                                                                                            | Nurse                       |                            |                                   | Physician                       |                                 |                   |
| 4. Educational attainment                                                                                                                                | Diploma of Nursing School   | Bachelor's Degree          |                                   | Nursing specialty program       |                                 | Master's Degree   |
| 5. Years of work experience                                                                                                                              | <1                          | 1-5                        | 6-10                              | 11-20                           | 21-30                           | >30               |
| 6. Name/ region of the hospital.....<br>Type of hospital                                                                                                 | Public                      |                            |                                   | Private                         |                                 |                   |
| 7. Prior education or training relevant to stroke care                                                                                                   | Yes                         |                            |                                   | No                              |                                 |                   |
| 8. If you had any prior education or training relevant to stroke care, what was the source of such education or training? (please circle all that apply) | Class (undergraduate level) | Class (postgraduate level) | Brief presentation on stroke care | Congress/ educational work-shop | Leaflet/ other printed material | Self-guided study |

## Part B

| Knowledge questions - Please circle the correct answer:                                                                    |          |               |
|----------------------------------------------------------------------------------------------------------------------------|----------|---------------|
| 1. Every patient presenting with stroke should be treated as a medical emergency, whether eligible for thrombolysis or not |          |               |
| A. RIGHT                                                                                                                   | B. WRONG | C. DON'T KNOW |
| 2. Stroke represents a life-threatening situation                                                                          |          |               |
| A. RIGHT                                                                                                                   | B. WRONG | C. DON'T KNOW |
| 3. EDs play a vital role in the early recognition of stroke and the timely commencement of treatment                       |          |               |
| A. RIGHT                                                                                                                   | B. WRONG | C. DON'T KNOW |
| 4. EMS personnel should inform ED about the transfer of a patient with a probable stroke                                   |          |               |
| A. RIGHT                                                                                                                   | B. WRONG | C. DON'T KNOW |
| 5. NIHSS is the proposed scale for stroke severity assessment                                                              |          |               |
| A. RIGHT                                                                                                                   | B. WRONG | C. DON'T KNOW |
| 6. A patient presenting to the ED with stroke is most likely to experience which of the following symptoms?                |          |               |
| i) Tremor, dizziness, vomiting                                                                                             |          |               |
| ii) Altered level of consciousness, tachypnea, cyanosis                                                                    |          |               |
| iii) Unilateral arm or leg weakness or face drooping or difficulty speaking                                                |          |               |
| 7. Which of the following can mimic stroke?                                                                                |          |               |

|                                                                                                                                                   |          |               |
|---------------------------------------------------------------------------------------------------------------------------------------------------|----------|---------------|
| i) Hypoglycemia<br>ii) Hyperkalemia<br>iii) Heat stroke<br>iv) Pulmonary embolism                                                                 |          |               |
| 8. Brain MRI is the recommended diagnostic modality to differentiate between ischemic and hemorrhagic stroke                                      |          |               |
| A. RIGHT                                                                                                                                          | B. WRONG | C. DON'T KNOW |
| 9. In a patient with suspected stroke, clinical examination and history taking can securely differentiate between ischemic and hemorrhagic stroke |          |               |
| A. RIGHT                                                                                                                                          | B. WRONG | C. DON'T KNOW |
| 10. 60 minutes is the maximum time allowed from the arrival of the patient at the ED and the commencement of diagnostic examinations              |          |               |
| A. RIGHT                                                                                                                                          | B. WRONG | C. DON'T KNOW |
| 11. A patient with suspected stroke, regardless of severity and neurological deficit, must be placed in bed, supine                               |          |               |
| A. RIGHT                                                                                                                                          | B. WRONG | C. DON'T KNOW |
| 12. In patients with suspected stroke, blood pressure should be measured on both arms and a finger stick glucose test performed                   |          |               |
| A. RIGHT                                                                                                                                          | B. WRONG | C. DON'T KNOW |
| 13. Hypotension and hypovolemia should be treated before starting thrombolysis                                                                    |          |               |
| A. RIGHT                                                                                                                                          | B. WRONG | C. DON'T KNOW |
| 14. Thrombolysis must be administered to eligible stroke patients within a time-window of 3 hours                                                 |          |               |
| A. RIGHT                                                                                                                                          | B. WRONG | C. DON'T KNOW |
| 15. Patients aged over 80 years should be excluded from thrombolysis                                                                              |          |               |

|                                                                                                                                                                                     |             |               |              |
|-------------------------------------------------------------------------------------------------------------------------------------------------------------------------------------|-------------|---------------|--------------|
| A. RIGHT                                                                                                                                                                            | B. WRONG    | C. DON'T KNOW |              |
| 16. In a stroke patient about to receive thrombolysis, the maximum acceptable body temperature is:                                                                                  |             |               |              |
| A. 37°C                                                                                                                                                                             | B. 37,5 °C  | C. 38 °C      | D. 38,5 °C   |
| 17. The lowest acceptable blood glucose level for a patient about to receive thrombolysis is 60 mg/dl                                                                               |             |               |              |
| A. RIGHT                                                                                                                                                                            | B. WRONG    | C. DON'T KNOW |              |
| 18. If the patient that is about to receive thrombolysis demonstrates an oxygen saturation of <94%, we administer oxygen via nasal cannula and proceed with thrombolysis as planned |             |               |              |
| A. RIGHT                                                                                                                                                                            | B. WRONG    | C. DON'T KNOW |              |
| 19. What is the recommended dose of rt-PA in a stroke patient?                                                                                                                      |             |               |              |
| A. 0,9mg/kg                                                                                                                                                                         | B. 90 mg/kg | C. 0,6 mg/kg  | D. 1,3 mg/kg |
| 20. What is the maximum acceptable blood pressure before administering thrombolysis?                                                                                                |             |               |              |
| A. 200/115                                                                                                                                                                          | B. 230/115  | C. 215/120    | D. 185/110   |
| 21. During the administration of thrombolysis, blood pressure must be measured every 30 minutes                                                                                     |             |               |              |
| A. RIGHT                                                                                                                                                                            | B. WRONG    | C. DON'T KNOW |              |
| 22. Administration of aspirin is recommended within 24 to 48 hours after thrombolysis                                                                                               |             |               |              |
| A. RIGHT                                                                                                                                                                            | B. WRONG    | C. DON'T KNOW |              |
| 23 Thrombolysis can be administered to a stroke patient who is receiving a therapeutic dose of heparin                                                                              |             |               |              |
| A. RIGHT                                                                                                                                                                            | B. WRONG    | C. DON'T KNOW |              |

|                                                                                                                                                                                                                   |          |               |
|-------------------------------------------------------------------------------------------------------------------------------------------------------------------------------------------------------------------|----------|---------------|
| 24. Maximum allowed dose of r-tPA is 40 mg                                                                                                                                                                        |          |               |
| A. RIGHT                                                                                                                                                                                                          | B. WRONG | C. DON'T KNOW |
| 25. For thrombolysis to be administered, blood tests, chest x-ray and electrocardiogram must all be completed                                                                                                     |          |               |
| A. RIGHT                                                                                                                                                                                                          | B. WRONG | C. DON'T KNOW |
| 26. After thrombolysis treatment, the patient must be transferred to an ICU for 12 hours                                                                                                                          |          |               |
| A. RIGHT                                                                                                                                                                                                          | B. WRONG | C. DON'T KNOW |
| 27. In a patient who has received thrombolysis, vital signs should be taken regularly only during the first 12 hours receiving r-tPA                                                                              |          |               |
| A. RIGHT                                                                                                                                                                                                          | B. WRONG | C. DON'T KNOW |
| 28. In a patient with a severe stroke and large-vessel occlusion, thus with an indication for thrombectomy, we immediately administer thrombolysis (if the patient is eligible for that) and thrombectomy follows |          |               |
| A. RIGHT                                                                                                                                                                                                          | B. WRONG | C. DON'T KNOW |

### Part C

| Self-assessment on knowledge of stroke recognition and management    |        |      |           |        |
|----------------------------------------------------------------------|--------|------|-----------|--------|
| How would you describe your level of knowledge on stroke in general? | Poorly | Well | Very well | Expert |

ED: Emergency Department; EMS: Emergency Medical Services; ICU: Intensive Care Unit; NIHSS: National Institutes of Health Stroke Scale; MRI: Magnetic Resonance Imaging; r-tPA: recombinant-tissue Plasminogen Activator.

**Supplementary File S2 (SF2): Multiple linear regression model predicting stroke knowledge as measured with the 28-item stroke knowledge questionnaire (N=281)**

| Independent variables    | Total stroke knowledge score |            |       |                  | General knowledge |            |       |                  | Stroke recognition |            |       |              | Stroke management |            |       |                  |
|--------------------------|------------------------------|------------|-------|------------------|-------------------|------------|-------|------------------|--------------------|------------|-------|--------------|-------------------|------------|-------|------------------|
|                          | Beta                         | Std. error | t     | p.value          | B                 | Std. error | t     | p.value          | B                  | Std. error | t     | p.value      | B                 | Std. error | t     | p.value          |
| <b>Hospital</b>          |                              |            |       |                  |                   |            |       |                  |                    |            |       |              |                   |            |       |                  |
| Private Hospital A       | -0.86                        | 1.41       | -0.61 | 0.544            | -0.21             | 0.31       | -0.68 | 0.499            | -1.53              | 0.56       | -2.74 | <b>0.007</b> | -0.21             | 0.31       | -0.68 | 0.499            |
| Private Hospital B       | -4.24                        | 1.28       | -3.31 | <b>0.001</b>     | -0.38             | 0.28       | -1.37 | 0.172            | -1.59              | 0.51       | -3.16 | <b>0.002</b> | -0.38             | 0.28       | -1.37 | <b>0.172</b>     |
| Private Hospital C       | -1.81                        | 1.45       | -1.24 | 0.215            | -0.58             | 0.31       | -1.84 | 0.067            | -0.58              | 0.57       | -1.01 | 0.315        | -0.58             | 0.31       | -1.84 | 0.067            |
| Private Hospital D       | -0.46                        | 1.56       | -0.29 | 0.768            | -0.02             | 0.34       | -0.05 | 0.960            | -0.76              | 0.62       | -1.22 | 0.223        | -0.02             | 0.34       | -0.05 | 0.960            |
| Hospital A               | -3.28                        | 0.75       | -4.39 | <b>&lt;0.001</b> | -1.13             | 0.16       | -7.00 | <b>&lt;0.001</b> | -0.91              | 0.29       | -3.10 | <b>0.002</b> | -1.13             | 0.16       | -7.00 | <b>&lt;0.001</b> |
| Hospital B               | -2.58                        | 0.95       | -2.72 | <b>0.007</b>     | -0.40             | 0.21       | -1.93 | 0.055            | -0.64              | 0.38       | -1.71 | 0.089        | -0.40             | 0.21       | -1.93 | <b>0.055</b>     |
| Hospital C               | -1.37                        | 1.05       | -1.30 | 0.195            | -0.31             | 0.23       | -1.36 | 0.176            | -0.93              | 0.42       | -2.24 | <b>0.026</b> | -0.31             | 0.23       | -1.36 | 0.176            |
| Hospital D               | -3.85                        | 0.95       | -4.05 | <b>&lt;0.001</b> | -1.06             | 0.21       | -5.17 | <b>&lt;0.001</b> | -0.86              | 0.38       | -2.30 | <b>0.022</b> | -1.06             | 0.21       | -5.17 | <b>&lt;0.001</b> |
| Hospital E               | -3.26                        | 1.13       | -2.89 | <b>0.004</b>     | -0.41             | 0.24       | -1.70 | 0.091            | -0.29              | 0.45       | -0.66 | 0.511        | -0.41             | 0.24       | -1.70 | 0.091            |
| Hospital F               | -3.87                        | 1.24       | -3.11 | <b>0.002</b>     | -0.37             | 0.27       | -1.35 | 0.177            | -1.40              | 0.49       | -2.84 | <b>0.005</b> | -0.37             | 0.27       | -1.35 | <b>0.177</b>     |
| <b>Gender</b>            |                              |            |       |                  |                   |            |       |                  |                    |            |       |              |                   |            |       |                  |
| Female                   | 0.04                         | 0.50       | 0.09  | 0.930            | 0.08              | 0.11       | 0.76  | 0.449            | 0.12               | 0.20       | 0.59  | 0.557        | 0.08              | 0.11       | 0.76  | 0.449            |
| <b>Age group (years)</b> |                              |            |       |                  |                   |            |       |                  |                    |            |       |              |                   |            |       |                  |
| 30-39                    | -0.61                        | 0.77       | -0.80 | 0.423            | 0.00              | 0.17       | 0.00  | 1.000            | 0.05               | 0.30       | 0.18  | 0.856        | 0.00              | 0.17       | 0.00  | 1.000            |
| 40-49                    | -0.10                        | 1.16       | -0.09 | 0.930            | 0.48              | 0.25       | 1.91  | 0.057            | 0.12               | 0.46       | 0.27  | 0.790        | 0.48              | 0.25       | 1.91  | 0.057            |

|                                                |       |      |       |        |       |      |       |       |       |      |       |       |       |      |       |       |
|------------------------------------------------|-------|------|-------|--------|-------|------|-------|-------|-------|------|-------|-------|-------|------|-------|-------|
| 50-60                                          | -2.30 | 1.63 | -1.41 | 0.160  | -0.12 | 0.35 | -0.35 | 0.726 | -0.64 | 0.64 | -0.99 | 0.324 | -0.12 | 0.35 | -0.35 | 0.726 |
| >60                                            | -1.23 | 3.12 | -0.39 | 0.694  | -0.42 | 0.68 | -0.62 | 0.536 | 0.07  | 1.23 | 0.06  | 0.955 | -0.42 | 0.68 | -0.62 | 0.536 |
| <b>Educational attainment</b>                  |       |      |       |        |       |      |       |       |       |      |       |       |       |      |       |       |
| Diploma of Nursing School                      | 0.10  | 2.17 | 0.05  | 0.964  | 0.21  | 0.47 | 0.45  | 0.650 | -0.71 | 0.86 | -0.82 | 0.411 | 0.21  | 0.47 | 0.45  | 0.650 |
| Nursing specialty program                      | -1.37 | 2.36 | -0.58 | 0.562  | 0.62  | 0.51 | 1.21  | 0.228 | -1.30 | 0.93 | -1.40 | 0.163 | 0.62  | 0.51 | 1.21  | 0.228 |
| Bachelor Degree                                | -0.89 | 0.53 | -1.66 | 0.098  | -0.10 | 0.12 | -0.84 | 0.400 | -0.15 | 0.21 | -0.72 | 0.473 | -0.10 | 0.12 | -0.84 | 0.400 |
| <b>Profession</b>                              |       |      |       |        |       |      |       |       |       |      |       |       |       |      |       |       |
| Physician                                      | 3.72  | 0.93 | 4.00  | <0.001 | 0.22  | 0.20 | 1.11  | 0.269 | 1.28  | 0.37 | 3.48  | 0.001 | 0.22  | 0.20 | 1.11  | 0.269 |
| <b>Work experience (in years)</b>              |       |      |       |        |       |      |       |       |       |      |       |       |       |      |       |       |
| 1-5                                            | 3.99  | 1.77 | 2.26  | 0.025  | 0.70  | 0.38 | 1.82  | 0.069 | 1.07  | 0.70 | 1.53  | 0.127 | 0.70  | 0.38 | 1.82  | 0.069 |
| 6-10                                           | 3.78  | 1.82 | 2.07  | 0.039  | 0.54  | 0.39 | 1.37  | 0.171 | 0.77  | 0.72 | 1.08  | 0.283 | 0.54  | 0.39 | 1.37  | 0.171 |
| 11-20                                          | 4.47  | 1.91 | 2.33  | 0.020  | 0.48  | 0.41 | 1.17  | 0.245 | 1.01  | 0.76 | 1.33  | 0.185 | 0.48  | 0.41 | 1.17  | 0.245 |
| 21-30                                          | 5.15  | 2.27 | 2.27  | 0.024  | 0.36  | 0.49 | 0.73  | 0.464 | 1.33  | 0.90 | 1.48  | 0.139 | 0.36  | 0.49 | 0.73  | 0.464 |
| >30                                            | 6.96  | 2.57 | 2.71  | 0.007  | 0.97  | 0.56 | 1.74  | 0.084 | 1.90  | 1.02 | 1.87  | 0.062 | 0.97  | 0.56 | 1.74  | 0.084 |
| <b>Prior education/training in stroke care</b> | 1.01  | 0.51 | 1.99  | 0.048  | 0.22  | 0.11 | 2.03  | 0.044 | 0.51  | 0.20 | 2.56  | 0.011 | 0.22  | 0.11 | 2.03  | 0.044 |
